# Supplementary material
Source: HighWire-hosted journal article supplement (https://fn.bmj.com/content/archdischild-2021-322846)
Supplement: inline-supplementary-material-2 [file inline-supplementary-material-2.xlsx]

## Sheet: Interface
	Tool to compare individual brain volume results of preterms scanned with MRI
	at term equivalent age. Please enter your individual results below to obtain a z-score
	in reference to Romberg et al.
	Total brain volume	Your value:		ml
		Resulting z-score:	Please enter your TBV above…
	Cerebellar volume	Your value:		ml
		Resulting z-score:	Please enter your CV above…
	Cortical gray matter volume	Your value:		ml
		Resulting z-score:	Please enter your cGMV above…
	Unmyelinated white matter volume	Your value:		ml
		Resulting z-score:	Please enter your uWMV above…

## Sheet: Raw data
	Values below are provided based on Romberg et al. They are used on the interface tab
	to calculate z-scores; DO NOT CHANGE THESE VALUES (unless you have better ones ;) !
	Total brain volume	Mean:	391.48	ml
		Standard Deviation:	66.54	ml
	Cerebellar volume	Mean:	18.95	ml
		Standard Deviation:	5.14	ml
	Cortical gray matter volume	Mean:	134.56	ml
		Standard Deviation:	68.36	ml
	Unmyelinated white matter volume	Mean:	192.14	ml
		Standard Deviation:	38.36	ml
	Hints:		Please enter your TBV above…
			Please enter your CV above…
			Please enter your cGMV above…
			Please enter your uWMV above…
